# Supplementary material for: The PI-3-Kinase P110α Catalytic Subunit of T Lymphocytes Modulates Collagen-Induced Arthritis
Source: MDPI journal article supplement (doi:10.3390/ijms22126405), 2021-06-15
Supplement: s1 [file s1]

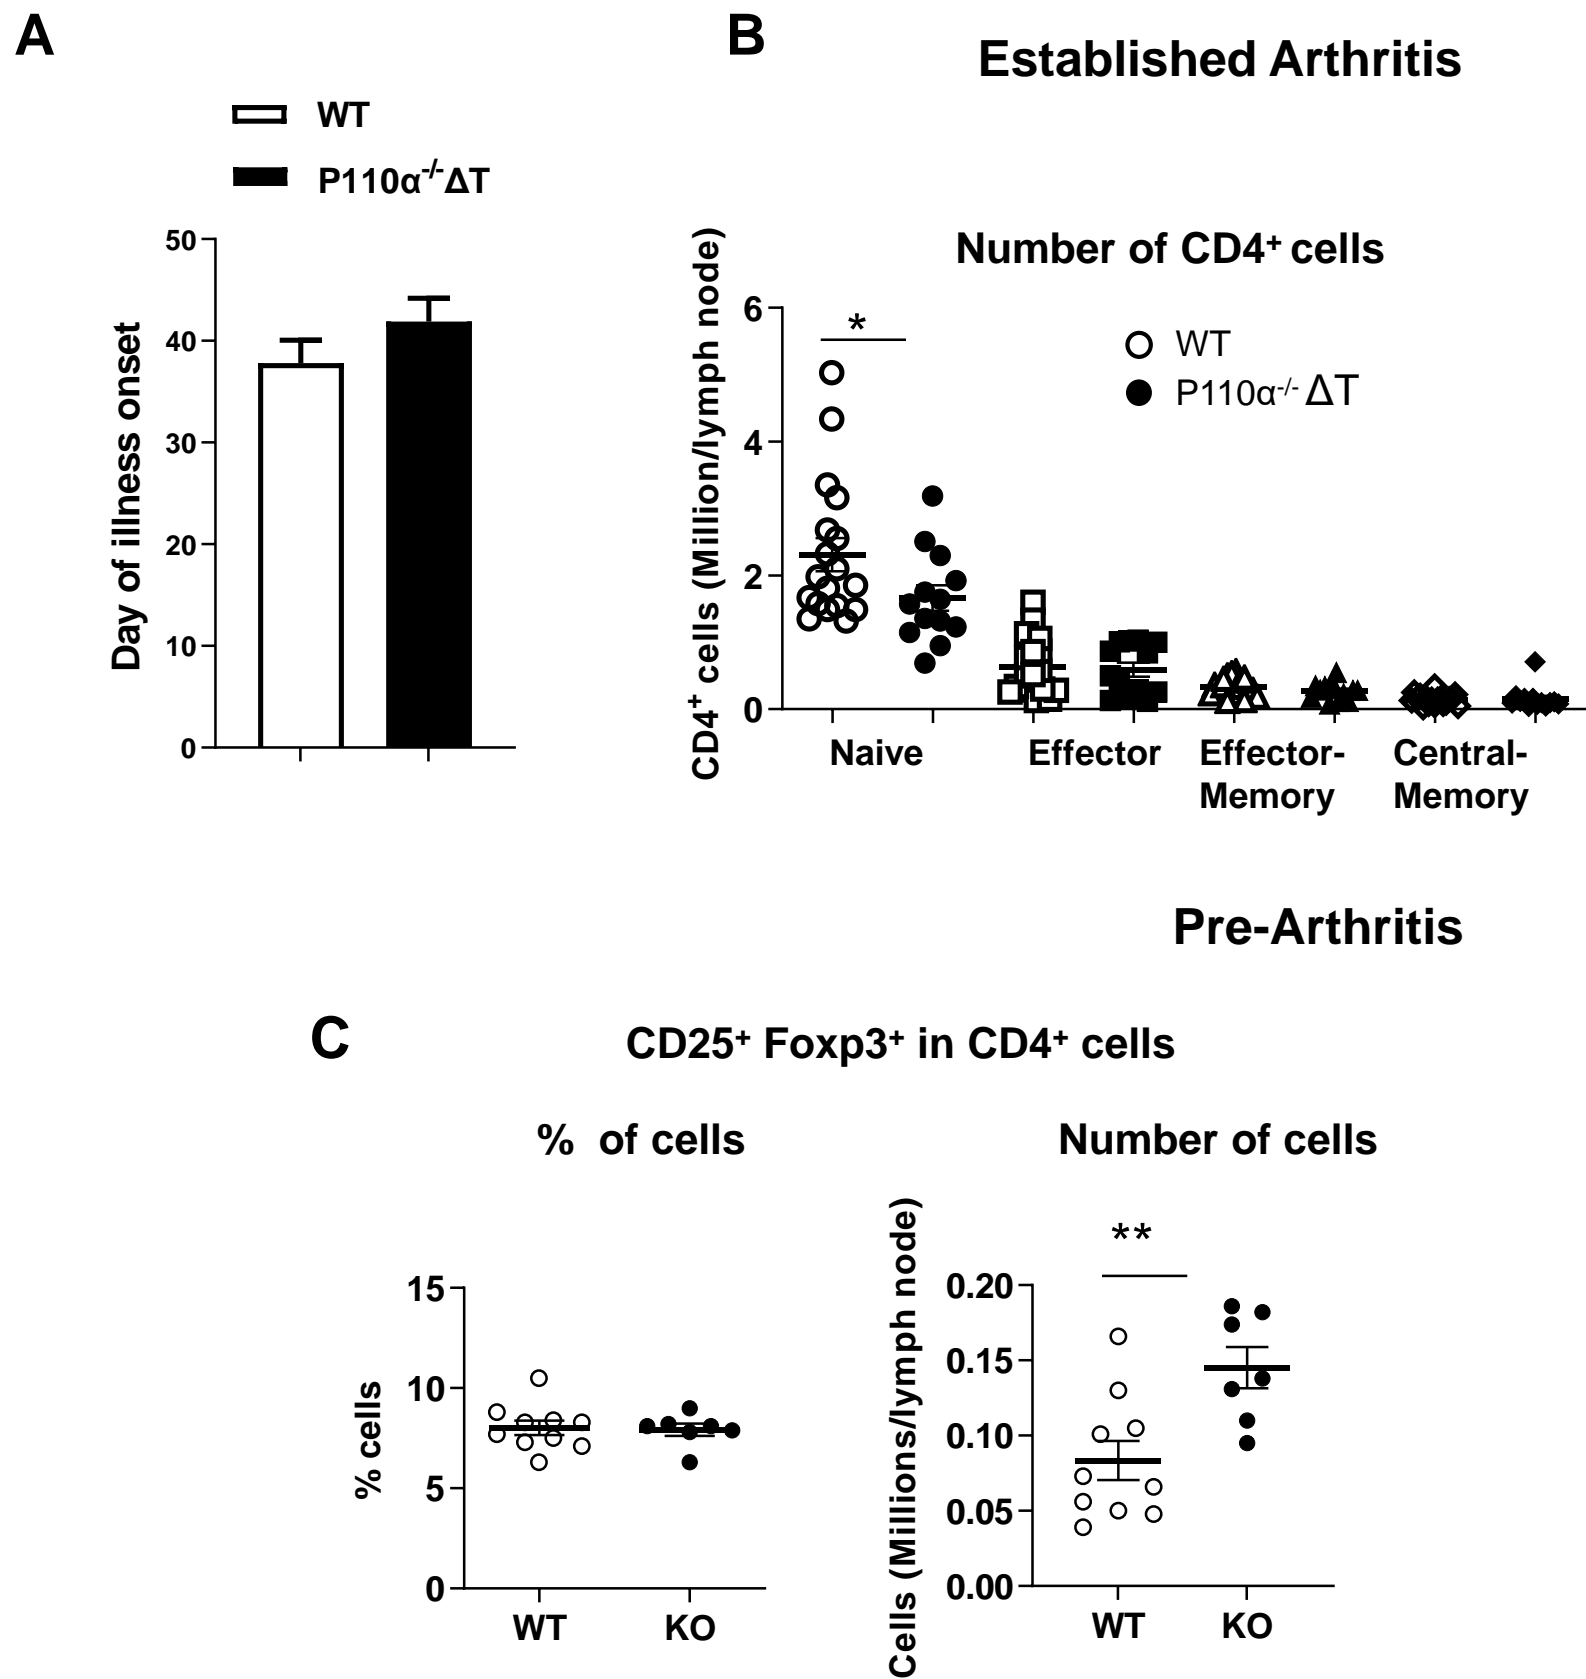

**Figure S1. Collagen-Induced Arthritis in P110 $\alpha^{-/-}$ ΔT mice supplementary material**

- A. The first day of illness symptoms (day of illness onset) after immunization of the mice with type II collagen in complete Freund's adjuvant was registered. Data are Mean $\pm$ SEM. 37.80 $\pm$ 2.25 for WT vs. 41.88 $\pm$ 2.3 for p110 $\alpha^{-/-}$ ΔT. N=24 for control group (white) and n= 25 for p110 $\alpha^{-/-}$ ΔT mice (black).
- B. Upon termination of long term experiments (established arthritis) CD4<sup>+</sup> cell subpopulations were analyzed by cytometry in the lymph nodes cells of WT and p110 $\alpha^{-/-}$ ΔT mice. Absolute numbers of naive, effector and memory CD4<sup>+</sup> T cells, basing in CD62-L and CD44 surface markers expression. N= 18 for WT and n=13 for p110 $\alpha^{-/-}$ ΔT mice. \*, p<0.05. Data (mean  $\pm$  SEM) from individual mice analyzed.
- C. Thirteen days after Ag immunization (pre-arthritis) CD4<sup>+</sup> cell subpopulations were analyzed by cytometry in the lymph nodes cells of WT and p110 $\alpha^{-/-}$ ΔT mice. Percentage and absolute numbers of T regulatory CD25<sup>+</sup>Foxp3<sup>+</sup> cells are shown, using CD25 and FoxP3 as expression markers. \*\*, p<0.01. Data (mean  $\pm$  SEM) from individual mice analyzed.

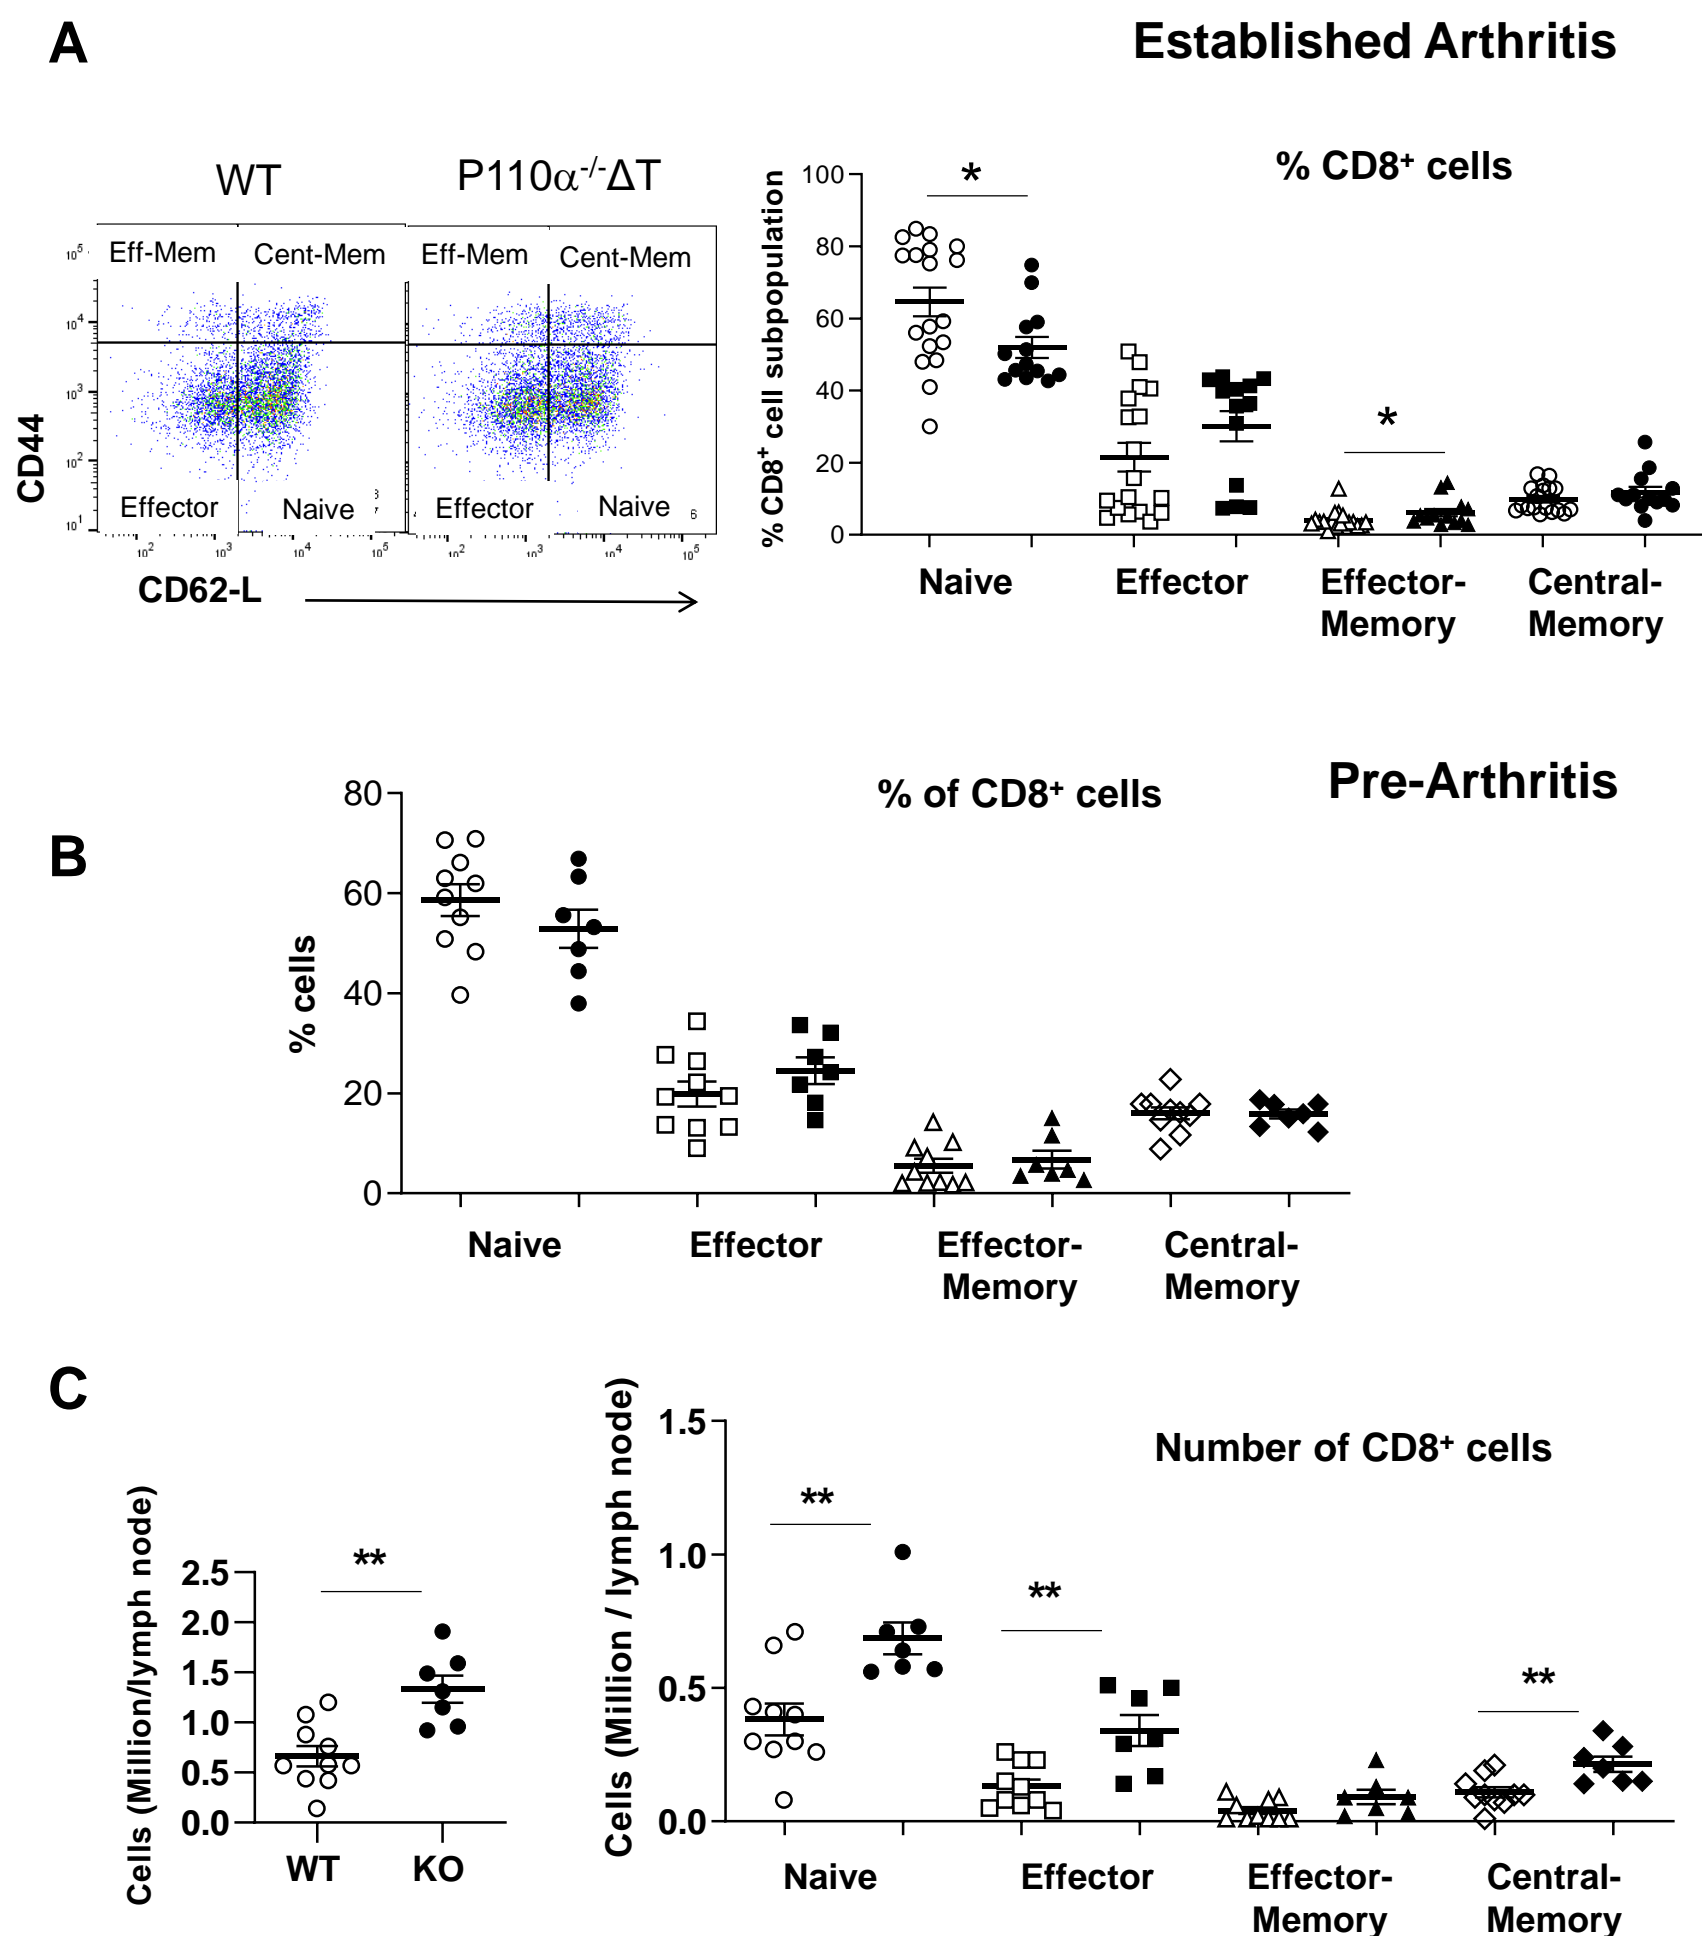

**Figure S2. Analysis of CD8<sup>+</sup> subpopulations in p110 $\alpha^{-/-}\Delta T$  mice under CIA.**

Upon long term experiments termination (established arthritis) **(A)** the fraction of CD8<sup>+</sup> cells in the lymph nodes of WT and p110 $\alpha^{-/-}\Delta T$  mice was analyzed by cytometry. **(Left)** Representative dot-plots showing the expression of CD44 and CD62-L in gated CD8<sup>+</sup> T cells and the distribution of naive, effector and memory subpopulations **(Right)** Percentages of that subpopulations are represented.

Thirteen days **(B and C)** after Ag immunization, the fraction of CD8<sup>+</sup> cells subpopulations in the lymph nodes of WT and p110 $\alpha^{-/-}\Delta T$  mice were analyzed. Percentage **(B)** and absolute numbers **(C)** of that subpopulations are represented.

N=23 for WT and n= 20 for p110 $\alpha^{-/-}\Delta T$  mice in **A**, and N= 18 for WT and n=13 for p110 $\alpha^{-/-}\Delta T$  mice in **B**.

\*, p<0.05; \*\*, p<0.01. Data show the mean  $\pm$  SEM from individual mice analyzed.
